# Supplementary material
Source: ML conference proceedings conference paper supplement (https://proceedings.mlr.press/v54/goldfarb17a.html)

# Supplementary Material: Linear Convergence of Stochastic Frank Wolfe Variants

Donald Goldfarb  
Columbia University

Garud Iyengar  
Columbia University

Chaoxu Zhou  
Columbia University

## 1 Proof of Lemma 2

*Proof.* To prove the result, we use brackets of the type  $[f_{\theta} - \epsilon g/2, f_{\theta} + \epsilon g/2]$  for  $\theta$  that ranging over a suitably chosen subset of  $\Theta$  and these brackets have  $L_1$ -size  $\epsilon \|g\|_1$ . If  $\|\theta_1 - \theta_2\| \leq \epsilon/2$ , then by the Lipschitz condition that

$$|f_{\theta_1}(\xi) - f_{\theta_2}(\xi)| \leq g(\xi) \|\theta_1 - \theta_2\|, \quad (1)$$

we have  $f_{\theta_1} - \epsilon g/2 \leq f_{\theta_2} \leq f_{\theta_1} + \epsilon g/2$ . Therefore, the brackets cover  $\mathcal{F}$  if  $\theta$  ranges over a grid of meshwidth  $\epsilon/\sqrt{p}$  over  $\Theta$ . This grid has at most  $(\sqrt{p}D_{\Theta}/\epsilon)^p$  grid points. Therefore the bracketing number  $N_{[]}(\epsilon \|g\|_1, \mathcal{F}, L_1)$  can be bounded by  $(\sqrt{p}D_{\Theta}/\epsilon)^p$ .  $\square$

## 2 Proof of Lemma 3

*Proof.* Consider the function class  $\mathcal{F} = \{f(\cdot, \mathbf{x}) \mid \mathbf{x} \in \mathcal{P}\}$  as defined in (SP1), that is  $f(i, \mathbf{x}) = f_i(\mathbf{x})$ . Since  $f_i(\cdot)$  each is assumed to be Lipschitz continuous with Lipschitz constant  $L_i$ , we must have  $|f_i(\mathbf{x}) - f_i(\mathbf{y})| \leq L_i \|\mathbf{x} - \mathbf{y}\|$ , where  $L_F \equiv \max\{L_1, \dots, L_n\}$ . Moreover, the index set  $\mathcal{P} \in \mathbb{R}^p$  for the function class  $\mathcal{F}$  is assume to be bounded. Therefore all conditions for Lemma 2 are satisfied and hence the number of brackets of the type  $[f(\cdot, \mathbf{x}) - \epsilon L_F, f(\cdot, \mathbf{x}) + \epsilon L_F]$  satisfies

$$N_{[]}(\epsilon L_F, \mathcal{F}, L_1) \leq K_{\mathcal{P}} \left(\frac{D}{\epsilon}\right)^p,$$

for every  $0 < \epsilon < D$ , where  $D = \sup\{\|\mathbf{x} - \mathbf{y}\| \mid \mathbf{x}, \mathbf{y} \in \mathcal{P}\}$  and  $K_{\mathcal{P}} = (\sqrt{p})^p$ . Let  $\Gamma \subset \mathcal{P}$  denote the set of indices of the centers of these brackets and  $\xi_1, \dots, \xi_{m^{(k)}}$  be the i.i.d. samples drawn at the  $k$ -th iteration of the algorithm. Since the brackets centered at  $\Gamma$  cover  $\mathcal{F}$ , we must have

$$\begin{aligned} & \sup_{\mathbf{x} \in \mathcal{P}} \left| \frac{1}{m^{(k)}} \sum_{i=1}^{m^{(k)}} f(\xi_i, \mathbf{x}) - \mathbb{E}f(\xi_i, \mathbf{x}) \right| \\ & \leq \max\left\{ \left| \frac{1}{m^{(k)}} \sum_{i=1}^{m^{(k)}} f(\xi_i, \mathbf{y}) - \mathbb{E}f(\xi_i, \mathbf{y}) \right| \mid \mathbf{y} \in \Gamma \right\} + 2\epsilon L_F. \end{aligned}$$

Consequently, for every  $\delta \geq 0$  and  $\epsilon < \min\{\delta/(2L_F), D\}$ ,

$$\begin{aligned} & \mathbb{P}\left\{ \sup_{\mathbf{x} \in \mathcal{P}} \left| \frac{1}{m^{(k)}} \sum_{i=1}^{m^{(k)}} f(\xi_i, \mathbf{x}) - \mathbb{E}f(\xi_i, \mathbf{x}) \right| \geq \delta \right\} \\ & \leq \mathbb{P}\left\{ \max\left\{ \left| \frac{1}{m^{(k)}} \sum_{i=1}^{m^{(k)}} f(\xi_i, \mathbf{y}) - \mathbb{E}f(\xi_i, \mathbf{y}) \right| \mid \mathbf{y} \in \Gamma \right\} + 2\epsilon L_F \geq \delta \right\} \\ & \leq \sum_{\mathbf{y} \in \Gamma} \mathbb{P}\left\{ \left| \frac{1}{m^{(k)}} \sum_{i=1}^{m^{(k)}} f(\xi_i, \mathbf{y}) - \mathbb{E}f(\xi_i, \mathbf{y}) \right| \geq \delta - 2\epsilon L_F \right\} \\ & \quad \text{(union bound)} \\ & \leq \sum_{\mathbf{y} \in \Gamma} 2 \exp\left\{ -\frac{2m^{(k)}(\delta - 2L_F\epsilon)^2}{(u_F - l_F)^2} \right\} \\ & \quad \text{(Hoeffding inequality)} \\ & \leq 2K_{\mathcal{P}} \left(\frac{D}{\epsilon}\right)^p \exp\left\{ -\frac{2m^{(k)}(\delta - 2L_F\epsilon)^2}{(u_F - l_F)^2} \right\}. \\ & \quad (|\Gamma| \leq K_{\mathcal{P}} \left(\frac{D}{\epsilon}\right)^p) \end{aligned}$$

Since by definition,  $F^{(k)}(\mathbf{x}) = \frac{1}{m^{(k)}} \sum_{i=1}^{m^{(k)}} f(\xi_i, \mathbf{x})$  and  $F(\mathbf{x}) = \mathbb{E}f(\xi_i, \mathbf{x})$ , the desired result follows.  $\square$

## 3 Proof of Corollary 1

*Proof.* First note that both  $F^{(k)}(\cdot)$  and  $F(\cdot)$  are bounded by  $l_F$  and  $u_F$ ; hence,  $\sup_{\mathbf{x} \in \mathcal{P}} |F^{(k)}(\mathbf{x}) - F(\mathbf{x})| \leq 2(|u_F| + |l_F|)$ . Then for every  $\delta \geq 0$ , we have

$$\begin{aligned} & \mathbb{E} \sup_{\mathbf{x} \in \mathcal{P}} |F^{(k)}(\mathbf{x}) - F(\mathbf{x})| \\ & \leq 2(|u_F| + |l_F|) \mathbb{P}\left\{ \sup_{\mathbf{x} \in \mathcal{P}} |F^{(k)}(\mathbf{x}) - F(\mathbf{x})| \geq \delta \right\} \\ & \quad + \delta \mathbb{P}\left\{ \sup_{\mathbf{x} \in \mathcal{P}} |F^{(k)}(\mathbf{x}) - F(\mathbf{x})| < \delta \right\} \\ & \leq 4(|u_F| + |l_F|) K_{\mathcal{P}} \left(\frac{D}{\epsilon}\right)^p \exp\left\{ -\frac{2m^{(k)}(\delta - 2L_F\epsilon)^2}{(u_F - l_F)^2} \right\} + \delta \\ & \leq 4(|u_F| + |l_F|) K_{\mathcal{P}} D^p \exp\left\{ -\frac{2m^{(k)}(\delta - 2L_F\epsilon)^2}{(u_F - l_F)^2} + p \log \frac{1}{\epsilon} \right\} + \delta. \end{aligned}$$

Now let  $\delta = \frac{(u_F - l_F) \sqrt{4(p+1) \log \sqrt{m^{(k)}}}}{\sqrt{m^{(k)}} \sqrt{2}}$ ,  $\epsilon = \frac{(u_F - l_F)}{2L_F \sqrt{m^{(k)}} \sqrt{2}}$ .

Then

$$\begin{aligned} & \mathbb{E} \sup_{\mathbf{x} \in \mathcal{P}} |F^{(k)}(\mathbf{x}) - F(\mathbf{x})| \\ & \leq 4(|u_F| + |l_F|) K_{\mathcal{P}} D^p \exp\{-(\sqrt{4(p+1) \log \sqrt{m^{(k)}}} - 1)^2 \\ & \quad - p(\log \frac{u_F - l_F}{2\sqrt{2}L_F}) + p \log \sqrt{m^{(k)}}\} \\ & \quad + \frac{(u_F - l_F) \sqrt{4(p+1) \log \sqrt{m^{(k)}}}}{\sqrt{m^{(k)}} \sqrt{2}}. \end{aligned}$$

Note that  $(x-1)^2 \geq x^2/4$  when  $x \geq 2$ . Thus, for  $m^{(k)} \geq 3$  and  $p \geq 1$ ,  $\sqrt{4(p+1) \log \sqrt{m^{(k)}}} \geq 2$ . Therefore

$$\begin{aligned} & \mathbb{E} \sup_{\mathbf{x} \in \mathcal{P}} |F^{(k)}(\mathbf{x}) - F(\mathbf{x})| \\ & \leq 4(|u_F| + |l_F|) K_{\mathcal{P}} D^p \exp\{-(p+1) \log(\sqrt{m^{(k)}}) \\ & \quad + p \log \sqrt{m^{(k)}} - p(\log \frac{u_F - l_F}{2\sqrt{2}L_F})\} \\ & \quad + \frac{(u_F - l_F) \sqrt{4(p+1) \log \sqrt{m^{(k)}}}}{\sqrt{m^{(k)}} \sqrt{2}} \\ & \leq C_1 \sqrt{\frac{\log m^{(k)}}{m^{(k)}}}, \end{aligned}$$

where  $C_1 = 4(|u_F| + |l_F|) K_{\mathcal{P}} D^p \exp\{-p(\log \frac{u_F - l_F}{2\sqrt{2}L_F})\} + (u_F - l_F) \sqrt{p+1}$ .

Next, we will obtain a bound for  $\mathbb{E}|F^{(k)}(\mathbf{x}_*^{(k)}) - F(\mathbf{x}^*)|$ . Lemma 3 implies both

$$F(\mathbf{x}_*^{(k)}) - \delta \leq F^{(k)}(\mathbf{x}_*^{(k)}) \leq F(\mathbf{x}_*^{(k)}) + \delta \quad (2)$$

and

$$F(\mathbf{x}^*) - \delta \leq F^{(k)}(\mathbf{x}^*) \leq F(\mathbf{x}^*) + \delta \quad (3)$$

happen with probability at least  $1 - 2K_{\mathcal{P}}(\frac{D}{\epsilon})^p \exp\{-\frac{m^{(k)}(\delta - 2L_F\epsilon)^2}{2(u_F - l_F)^2}\}$ . Consequently, on one hand

$$\begin{aligned} F^{(k)}(\mathbf{x}_*^{(k)}) & \geq F(\mathbf{x}_*^{(k)}) - \delta \quad (\text{by (2)}) \\ & \geq F(\mathbf{x}^*) - \delta \quad (\text{optimality of } \mathbf{x}^* \text{ for } F(\cdot)) \end{aligned}$$

On the other hand,

$$\begin{aligned} F^{(k)}(\mathbf{x}_*^{(k)}) & \leq F^{(k)}(\mathbf{x}^*) \quad (\text{optimality of } \mathbf{x}_*^{(k)} \text{ for } F^{(k)}(\cdot)) \\ & \leq F(\mathbf{x}^*) + \delta \quad (\text{by (3)}) \end{aligned}$$

Therefore, we have

$$\begin{aligned} & \mathbb{P}\{|F^{(k)}(\mathbf{x}_*^{(k)}) - F(\mathbf{x}^*)| \geq \delta\} \\ & \leq 2K_{\mathcal{P}}(\frac{D}{\epsilon})^p \exp\{-\frac{m^{(k)}(\delta - 2L_F\epsilon)^2}{2(u_F - l_F)^2}\}, \end{aligned}$$

and hence  $\mathbb{E}|F^{(k)}(\mathbf{x}_*^{(k)}) - F(\mathbf{x}^*)| = C_1 \sqrt{\frac{\log m^{(k)}}{m^{(k)}}}$ .  $\square$

## 4 Proof of Lemma 4

*Proof.* The right hand side of the stated result in Lemma 4 is obtained by setting  $b_i = 1$  for  $i \leq m$  and  $b_i = 0$  for  $i > m$ . We will show that this choice of  $\{b_i\}$  maximizes  $\sum_{k=1}^n a^{\sum_{j=k}^n b_j} c_k$ . Consider an assignment of  $b_i$  that there is a  $b_r = 0$  for  $r \leq m$  and  $b_s = 1$  for  $s > m$ . Define a new assignment  $b'_i$  such that there is  $b'_i = b_i$  for  $i \neq r, s$ ,  $b'_r = 1$  and  $b'_s = 0$ . Then

$$\begin{aligned} & \sum_{k=1}^n a^{\sum_{j=k}^n b_j} c_k \\ & = \sum_{k=s+1}^n a^{\sum_{j=k}^n b_j} c_k + \sum_{k=r}^s a^{\sum_{j=k}^n b_j} c_k + \sum_{k=1}^{r-1} a^{\sum_{j=k}^n b_j} c_k \\ & = \sum_{k=s+1}^n a^{\sum_{j=k}^n b'_j} c_k + \sum_{k=r+1}^s a^{\sum_{j=k}^n b_j} c_k + \sum_{k=1}^r a^{\sum_{j=k}^n b'_j} c_k \\ & = \sum_{k=s+1}^n a^{\sum_{j=k}^n b'_j} c_k + a \sum_{k=r+1}^s a^{\sum_{j=k}^n b'_j} c_k + \sum_{k=1}^r a^{\sum_{j=k}^n b'_j} c_k \\ & \leq \sum_{k=s+1}^n a^{\sum_{j=k}^n b'_j} c_k + \sum_{k=r+1}^s a^{\sum_{j=k}^n b'_j} c_k + \sum_{k=1}^r a^{\sum_{j=k}^n b'_j} c_k \\ & = \sum_{k=1}^n a^{\sum_{j=k}^n b'_j} c_k. \end{aligned}$$

Therefore, such interchanges will always increase the value of  $\sum_{k=1}^n a^{\sum_{j=k}^n b_j} c_k$  and hence setting  $b_i = 1$  for  $i \leq m$  and  $b_i = 0$  for  $i > m$  maximizes it.  $\square$

## 5 Proof of Theorem 1

*Proof.* At iteration  $k$ , let  $\mathbf{x}^{(k)}$  denote the current solution,  $\xi_1, \dots, \xi_{m^{(k)}}$  denote the samples obtained in the algorithm,  $\mathbf{d}^{(k)}$  denote the direction that the algorithm will take at this step and  $\gamma^{(k)}$  denote the step length. Define  $F^{(k)}(\mathbf{x}) = \frac{1}{m^{(k)}} \sum_{i=1}^{m^{(k)}} f(\xi_i, \mathbf{x})$ ,  $\mathbf{x}_*^{(k)} = \arg \min_{\mathbf{x} \in \mathcal{P}} F^{(k)}(\mathbf{x})$  and  $F_*^{(k)} = F^{(k)}(\mathbf{x}_*^{(k)})$ . Note that  $F^{(k)}$  is Lipschitz continuous with Lipschitz constant  $L^{(k)} = \frac{1}{m^{(k)}} \sum_{i=1}^{m^{(k)}} L_{\xi_i}$  and strongly convex with constant  $\sigma^{(k)} = \frac{1}{m^{(k)}} \sum_{i=1}^{m^{(k)}} \sigma_{\xi_i}$ . In addition, the stochastic gradient  $\mathbf{g}^{(k)} = \nabla F^{(k)}(\mathbf{x})$ . From the choice of  $\mathbf{d}^{(k)}$  in the algorithm,

$$\begin{aligned} \langle \mathbf{g}^{(k)}, \mathbf{d}^{(k)} \rangle & \leq \frac{1}{2} (\langle \mathbf{g}^{(k)}, \mathbf{p}^{(k)} - \mathbf{x}^{(k)} \rangle + \langle \mathbf{g}^{(k)}, \mathbf{x}^{(k)} - \mathbf{u}^{(k)} \rangle) \\ & = \frac{1}{2} \langle \mathbf{g}^{(k)}, \mathbf{p}^{(k)} - \mathbf{u}^{(k)} \rangle \leq 0. \end{aligned}$$

Hence, we can lower bound  $\langle \mathbf{g}^{(k)}, \mathbf{d}^{(k)} \rangle^2$  by

$$\begin{aligned}
 \langle \mathbf{g}^{(k)}, \mathbf{d}^{(k)} \rangle^2 &\geq \frac{1}{4} \langle \mathbf{g}^{(k)}, \mathbf{u}^{(k)} - \mathbf{p}^{(k)} \rangle^2 \\
 &\geq \frac{1}{4} \max_{\mathbf{p} \in V, \mathbf{u} \in U^{(k)}} \langle \mathbf{g}^{(k)}, \mathbf{u} - \mathbf{p} \rangle^2 \\
 &\quad (\text{definition of } \mathbf{p}^{(k)} \text{ and } \mathbf{u}^{(k)}) \\
 &= \frac{1}{4} \max_{\mathbf{p} \in V, \mathbf{u} \in U^{(k)}} \langle \nabla F^{(k)}(\mathbf{x}^{(k)}), \mathbf{u} - \mathbf{p} \rangle^2 \\
 &\quad (\mathbf{g}^{(k)} = \nabla F^{(k)}(\mathbf{x}^{(k)})) \\
 &\geq \frac{1}{4} \frac{\Omega_{\mathcal{P}}^2}{|U^{(k)}|^2} \frac{\langle \nabla F^{(k)}(\mathbf{x}^{(k)}), \mathbf{x}^{(k)} - \mathbf{x}_*^{(k)} \rangle^2}{\|\mathbf{x}^{(k)} - \mathbf{x}_*^{(k)}\|^2} \\
 &\quad (\text{by Lemma 1}) \\
 &\geq \frac{\Omega_{\mathcal{P}}^2}{4N^2} \frac{\{F^{(k)}(\mathbf{x}^{(k)}) - F_*^{(k)}\}^2}{\|\mathbf{x}^{(k)} - \mathbf{x}_*^{(k)}\|^2} \\
 &\quad (\text{Convexity of } F^{(k)}(\cdot)) \\
 &\geq \frac{\Omega_{\mathcal{P}}^2 \sigma_F}{8N^2} \{F^{(k)}(\mathbf{x}^{(k)}) - F_*^{(k)}\} \\
 &\quad (\text{by strong convexity of } F^{(k)}(\cdot)) \\
 &\geq \frac{\Omega_{\mathcal{P}}^2 \sigma_F}{8N^2} \{F^{(k)}(\mathbf{x}^{(k)}) - F_*^{(k)}\}.
 \end{aligned}$$

Similarly, we can upper bound  $\langle \mathbf{g}^{(k)}, \mathbf{d}^{(k)} \rangle$  by

$$\begin{aligned}
 \langle \mathbf{g}^{(k)}, \mathbf{d}^{(k)} \rangle &\leq \frac{1}{2} \langle \mathbf{g}^{(k)}, \mathbf{p}^{(k)} - \mathbf{u}^{(k)} \rangle \\
 &\leq \frac{1}{2} \langle \mathbf{g}^{(k)}, \mathbf{x}_*^{(k)} - \mathbf{x}^{(k)} \rangle \\
 &\quad (\text{definition of } \mathbf{p}^{(k)} \text{ and } \mathbf{u}^{(k)}) \\
 &= \frac{1}{2} \langle \nabla F^{(k)}(\mathbf{x}^{(k)}), \mathbf{x}_*^{(k)} - \mathbf{x}^{(k)} \rangle \\
 &\quad (\mathbf{g}^{(k)} = \nabla F^{(k)}(\mathbf{x}^{(k)})) \\
 &\leq \frac{1}{2} \{F_*^{(k)} - F^{(k)}(\mathbf{x}^{(k)})\}. \\
 &\quad (\text{Convexity of } F(\cdot))
 \end{aligned}$$

With the above bounds, we can separate our analysis into the following four cases at iteration  $k$

$$\begin{aligned}
 (A^{(k)}) \quad &\gamma_{\max}^{(k)} \geq 1 \text{ and } \gamma^{(k)} \leq 1. \\
 (B^{(k)}) \quad &\gamma_{\max}^{(k)} \geq 1 \text{ and } \gamma^{(k)} \geq 1. \\
 (C^{(k)}) \quad &\gamma_{\max}^{(k)} < 1 \text{ and } \gamma^{(k)} < \gamma_{\max}^{(k)}. \\
 (D^{(k)}) \quad &\gamma_{\max}^{(k)} < 1 \text{ and } \gamma^{(k)} = \gamma_{\max}^{(k)}.
 \end{aligned}$$

By the descent lemma, we have

$$\begin{aligned}
 F^{(k)}(\mathbf{x}^{(k+1)}) &= F^{(k)}(\mathbf{x}^{(k)} + \gamma^{(k)} \mathbf{d}^{(k)}) \\
 &\leq F^{(k)}(\mathbf{x}^{(k)}) + \gamma^{(k)} \langle \nabla F^{(k)}(\mathbf{x}^{(k)}), \mathbf{d}^{(k)} \rangle + \frac{L^{(k)}(\gamma^{(k)})^2}{2} \|\mathbf{d}^{(k)}\|^2 \\
 &= F^{(k)}(\mathbf{x}^{(k)}) + \gamma^{(k)} \langle \mathbf{g}^{(k)}, \mathbf{d}^{(k)} \rangle + \frac{L^{(k)}(\gamma^{(k)})^2}{2} \|\mathbf{d}^{(k)}\|^2. \quad (5)
 \end{aligned}$$

In case  $(A^{(k)})$ , let  $\delta_{A^{(k)}}$  denote the indicator function for this case. Then

$$\begin{aligned}
 &\delta_{A^{(k)}} \{F^{(k)}(\mathbf{x}^{(k+1)}) - F_*^{(k)}\} \\
 &\leq \delta_{A^{(k)}} \{F^{(k)}(\mathbf{x}^{(k)}) - F_*^{(k)} + \gamma^{(k)} \langle \mathbf{g}^{(k)}, \mathbf{d}^{(k)} \rangle + \\
 &\quad \frac{L^{(k)}(\gamma^{(k)})^2}{2} \|\mathbf{d}^{(k)}\|^2\} \\
 &= \delta_{A^{(k)}} \{F^{(k)}(\mathbf{x}^{(k)}) - F_*^{(k)} - \frac{\langle \mathbf{g}^{(k)}, \mathbf{d}^{(k)} \rangle^2}{2L^{(k)} \|\mathbf{d}^{(k)}\|^2}\} \\
 &\quad (\text{definition of } \gamma^{(k)} \text{ in case } A^{(k)}) \\
 &\leq \delta_{A^{(k)}} \left\{ \left(1 - \frac{\Omega_{\mathcal{P}}^2 \sigma_F}{16N^2 L^{(k)} D^2}\right) (F^{(k)}(\mathbf{x}^{(k)}) - F_*^{(k)}) \right\} \\
 &\leq \delta_{A^{(k)}} \left\{ \left(1 - \frac{\Omega_{\mathcal{P}}^2 \sigma_F}{16N^2 L_F D^2}\right) (F^{(k)}(\mathbf{x}^{(k)}) - F_*^{(k)}) \right\}
 \end{aligned}$$

In case  $(B^{(k)})$ , since  $\gamma^{(k)} > 1$ , we have

$$-\langle \mathbf{g}^{(k)}, \mathbf{d}^{(k)} \rangle > L^{(k)} \|\mathbf{d}^{(k)}\|^2 \quad \text{and} \quad (6)$$

$$\gamma^{(k)} \langle \mathbf{g}^{(k)}, \mathbf{d}^{(k)} \rangle + \frac{L^{(k)}(\gamma^{(k)})^2}{2} \|\mathbf{d}^{(k)}\|^2 \quad (7)$$

$$\leq \langle \mathbf{g}^{(k)}, \mathbf{d}^{(k)} \rangle + \frac{L^{(k)}}{2} \|\mathbf{d}^{(k)}\|^2. \quad (8)$$

Use  $\delta_{B^{(k)}}$  to denote the indicator function for this case. Then,

$$\begin{aligned}
 &\delta_{B^{(k)}} \{F^{(k)}(\mathbf{x}^{(k+1)}) - F_*^{(k)}\} \\
 &\leq \delta_{B^{(k)}} \{F^{(k)}(\mathbf{x}^{(k)}) - F_*^{(k)} + \\
 &\quad \gamma^{(k)} \langle \nabla F^{(k)}(\mathbf{x}^{(k)}), \mathbf{d}^{(k)} \rangle + \frac{L^{(k)}(\gamma^{(k)})^2}{2} \|\mathbf{d}^{(k)}\|^2\} \\
 &= \delta_{B^{(k)}} \{F^{(k)}(\mathbf{x}^{(k)}) - F_*^{(k)} + \gamma^{(k)} \langle \mathbf{g}^{(k)}, \mathbf{d}^{(k)} \rangle \\
 &\quad + \frac{L^{(k)}(\gamma^{(k)})^2}{2} \|\mathbf{d}^{(k)}\|^2\} \\
 &\leq \delta_{B^{(k)}} \{F^{(k)}(\mathbf{x}^{(k)}) - F_*^{(k)} + \langle \mathbf{g}^{(k)}, \mathbf{d}^{(k)} \rangle + \frac{L^{(k)}}{2} \|\mathbf{d}^{(k)}\|^2\} \\
 &\quad (\text{by } (8)) \\
 &\leq \delta_{B^{(k)}} \{F^{(k)}(\mathbf{x}^{(k)}) - F_*^{(k)} + \frac{1}{2} \langle \mathbf{g}^{(k)}, \mathbf{d}^{(k)} \rangle\} \quad (\text{by } (6)) \\
 &\leq \delta_{B^{(k)}} \left\{ \frac{1}{2} (F^{(k)}(\mathbf{x}^{(k)}) - F_*^{(k)}) \right\}
 \end{aligned}$$

In case  $(C^{(k)})$ , let  $\delta_{C^{(k)}}$  be the indicator function for this case and we can use exactly the same argument as in case (A) to obtain the following inequality

$$\begin{aligned}
 &\delta_{C^{(k)}} \{F^{(k)}(\mathbf{x}^{(k+1)}) - F_*^{(k)}\} \\
 &\leq \delta_{C^{(k)}} \left\{ F^{(k)}(\mathbf{x}^{(k)}) - F_*^{(k)} - \frac{\langle \mathbf{g}^{(k)}, \mathbf{d}^{(k)} \rangle^2}{2L^{(k)} \|\mathbf{d}^{(k)}\|^2} \right\} \\
 &\leq \delta_{C^{(k)}} \left\{ \left(1 - \frac{\Omega_{\mathcal{P}}^2 \sigma_F}{16N^2 L_F D^2}\right) (F^{(k)}(\mathbf{x}^{(k)}) - F_*^{(k)}) \right\}
 \end{aligned}$$

Case  $(D^{(k)})$  is the so called ‘‘drop step’’ in the conditional gradient algorithm with away-steps. Use  $\delta_{D^{(k)}}$  to denote

the indicator function for this case. Note that  $\gamma^{(k)} = \gamma_{\max}^{(k)} \leq -\langle \mathbf{g}^{(k)}, \mathbf{d}^{(k)} \rangle / (L^{(k)} \|\mathbf{d}^{(k)}\|^2)$  in this case. Hence, we have

$$\begin{aligned}
 & \delta_{D^{(k)}} \{ (F^{(k)}(\mathbf{x}^{(k+1)}) - F_*^{(k)}) \} \\
 & \leq \delta_{D^{(k)}} \{ F^{(k)}(\mathbf{x}^{(k)}) - F_*^{(k)} + \gamma^{(k)} \langle \nabla F^{(k)}(\mathbf{x}^{(k)}), \mathbf{d}^{(k)} \rangle \\
 & \quad + \frac{L^{(k)}(\gamma^{(k)})^2}{2} \|\mathbf{d}^{(k)}\|^2 \} \\
 & = \delta_{D^{(k)}} \{ F^{(k)}(\mathbf{x}^{(k)}) - F_*^{(k)} + \gamma^{(k)} \langle \mathbf{g}^{(k)}, \mathbf{d}^{(k)} \rangle + \\
 & \quad \frac{L^{(k)}(\gamma^{(k)})^2}{2} \|\mathbf{d}^{(k)}\|^2 \} \\
 & \leq \delta_{D^{(k)}} \{ F^{(k)}(\mathbf{x}^{(k)}) - F_*^{(k)} + \frac{\gamma^{(k)}}{2} \langle \mathbf{g}^{(k)}, \mathbf{d}^{(k)} \rangle \} \\
 & \leq \delta_{D^{(k)}} \{ F^{(k)}(\mathbf{x}^{(k)}) - F_*^{(k)} \}.
 \end{aligned}$$

Define  $\rho = \min\{\frac{1}{2}, \frac{\Omega_P^2 \sigma_F}{16N^2 L_F D^2}\}$ . Note that  $\rho$  is a deterministic constant between 0 and 1. Therefore we have

$$\begin{aligned}
 & F^{(k)}(\mathbf{x}^{(k+1)}) - F_*^{(k)} \\
 & \leq (\{1 - \rho\}^{1-\delta_{D^{(k)}}}) (F^{(k)}(\mathbf{x}^{(k)}) - F_*^{(k)}) \\
 & = (1 - \rho)^{\{1-\delta_{D^{(k)}}\}} (F^{(k-1)}(\mathbf{x}^{(k)}) - F_*^{(k-1)}) \\
 & \quad + (1 - \rho)^{\{1-\delta_{D^{(k)}}\}} \{ F^{(k)}(\mathbf{x}^{(k)}) - F_*^{(k)} \\
 & \quad - F^{(k-1)}(\mathbf{x}^{(k)}) + F_*^{(k-1)} \} \\
 & = (1 - \rho)^{\{1-\delta_{D^{(k)}}\}} (F^{(k-1)}(\mathbf{x}^{(k)}) - F_*^{(k-1)}) \\
 & \quad + (1 - \rho)^{\{1-\delta_{D^{(k)}}\}} \{ F^{(k)}(\mathbf{x}^{(k)}) - F(\mathbf{x}^{(k)}) + F(\mathbf{x}^{(k)}) \\
 & \quad - F^{(k-1)}(\mathbf{x}^{(k)}) + F^* - F_*^{(k)} + F_*^{(k-1)} - F^* \} \\
 & \leq (1 - \rho)^{\{1-\delta_{D^{(k)}}\}} (F^{(k-1)}(\mathbf{x}^{(k)}) - F_*^{(k-1)}) \\
 & \quad + (1 - \rho)^{\{1-\delta_{D^{(k)}}\}} \{ |F^{(k)}(\mathbf{x}^{(k)}) - F(\mathbf{x}^{(k)})| \\
 & \quad + |F^{(k-1)}(\mathbf{x}^{(k)}) - F(\mathbf{x}^{(k)})| + |F_*^{(k)} - F^*| \\
 & \quad + |F_*^{(k-1)} - F^*| \} \\
 & \leq (1 - \rho)^{\sum_{i=1}^k \{1-\delta_{D^{(i)}}\}} (F^{(0)}(\mathbf{x}^{(1)}) - F_*^{(0)}) + \\
 & \quad \sum_{i=1}^k (1 - \rho)^{\sum_{j=i}^k \{1-\delta_{D^{(j)}}\}} \{ |F^{(i)}(\mathbf{x}^{(i)}) - F(\mathbf{x}^{(i)})| \\
 & \quad + |F^{(i-1)}(\mathbf{x}^{(i)}) - F(\mathbf{x}^{(i)})| + |F_*^{(i)} - F^*| \\
 & \quad + |F_*^{(i-1)} - F^*| \}.
 \end{aligned}$$

At iteration  $k$ , there are at most  $(k+1)/2$  drop steps, i.e., at most  $(k+1)/2$   $\delta_{D^{(i)}}$ 's equal to 1. Then by Lemma ??,

we have

$$\begin{aligned}
 & \sum_{i=1}^k (1 - \rho)^{\sum_{j=i}^k \{1-\delta_{D^{(j)}}\}} \{ |F^{(i)}(\mathbf{x}^{(i)}) - F(\mathbf{x}^{(i)})| \\
 & \quad + |F^{(i-1)}(\mathbf{x}^{(i)}) - F(\mathbf{x}^{(i)})| + |F_*^{(i)} - F^*| + |F_*^{(i-1)} - F^*| \} \\
 & \leq \sum_{i=k/2}^k \{ |F^{(i)}(\mathbf{x}^{(i)}) - F(\mathbf{x}^{(i)})| + |F^{(i-1)}(\mathbf{x}^{(i)}) - F(\mathbf{x}^{(i)})| \\
 & \quad + |F_*^{(i)} - F^*| + |F_*^{(i-1)} - F^*| \} \\
 & \quad + \sum_{i=1}^{k/2-1} (1 - \rho)^{k/2-i} \{ |F^{(i)}(\mathbf{x}^{(i)}) - F(\mathbf{x}^{(i)})| \\
 & \quad + |F^{(i-1)}(\mathbf{x}^{(i)}) - F(\mathbf{x}^{(i)})| + |F_*^{(i)} - F^*| + |F_*^{(i-1)} - F^*| \}.
 \end{aligned}$$

Therefore

$$\begin{aligned}
 & F^{(k)}(\mathbf{x}^{(k+1)}) - F_*^{(k)} \\
 & \leq (1 - \rho)^{\frac{k-1}{2}} (u_F - l_F) + \sum_{i=k/2}^k \{ |F^{(i)}(\mathbf{x}^{(i)}) - F(\mathbf{x}^{(i)})| \\
 & \quad + |F^{(i-1)}(\mathbf{x}^{(i)}) - F(\mathbf{x}^{(i)})| + |F_*^{(i)} - F^*| + |F_*^{(i-1)} - F^*| \} \\
 & \quad + \sum_{i=1}^{k/2-1} (1 - \rho)^{k/2-i} \{ |F^{(i)}(\mathbf{x}^{(i)}) - F(\mathbf{x}^{(i)})| \\
 & \quad + |F^{(i-1)}(\mathbf{x}^{(i)}) - F(\mathbf{x}^{(i)})| + |F_*^{(i)} - F^*| + |F_*^{(i-1)} - F^*| \}.
 \end{aligned}$$

In addition,  $F^{(k)}(\mathbf{x}^{(k+1)}) - F_*^{(k)} = F(\mathbf{x}^{(k+1)}) - F^* + (F^{(k)}(\mathbf{x}^{(k+1)}) - F(\mathbf{x}^{(k+1)})) + (F^* - F_*^{(k)})$ . Thus

$$\begin{aligned}
 & F(\mathbf{x}^{(k+1)}) - F^* \\
 & \leq (1 - \rho)^{\frac{k-1}{2}} (u_F - l_F) + \sum_{i=k/2}^{k+1} \{ |F^{(i)}(\mathbf{x}^{(i)}) - F(\mathbf{x}^{(i)})| \\
 & \quad + |F^{(i-1)}(\mathbf{x}^{(i)}) - F(\mathbf{x}^{(i)})| + |F_*^{(i)} - F^*| + |F_*^{(i-1)} - F^*| \} \\
 & \quad + \sum_{i=1}^{k/2-1} (1 - \rho)^{k/2-i} \{ |F^{(i)}(\mathbf{x}^{(i)}) - F(\mathbf{x}^{(i)})| \\
 & \quad + |F^{(i-1)}(\mathbf{x}^{(i)}) - F(\mathbf{x}^{(i)})| + |F_*^{(i)} - F^*| + |F_*^{(i-1)} - F^*| \}.
 \end{aligned}$$

Note that for any deterministic  $\mathbf{x} \in \mathcal{P}$ , we have  $\mathbb{E}F^{(k)}(\mathbf{x}) = F(\mathbf{x})$ . In addition, by Corollary ??, the following bound holds for every iteration  $k$

$$\begin{aligned}
 & \mathbb{E}|F^{(k)}(\mathbf{x}^{(k)}) - F(\mathbf{x}^{(k)})| \\
 & \leq \mathbb{E} \sup_{\mathbf{x} \in \mathcal{P}} |F^{(k)}(\mathbf{x}) - F(\mathbf{x})| \leq C_1 \sqrt{\frac{\log m^{(k)}}{m^{(k)}}}
 \end{aligned}$$

and

$$\mathbb{E}|F_*^{(k)} - F^*| \leq C_1 \sqrt{\frac{\log m^{(k)}}{m^{(k)}}}.$$

Combining all above bounds and use  $m^{(i)} = \lceil 1/(1 - \rho)^{2i+2} \rceil$ , we have

$$\begin{aligned}
& \mathbb{E}\{F(\mathbf{x}^{(k+1)}) - F^*\} \\
& \leq (1 - \rho)^{\frac{k-1}{2}} (u_F - l_F) \\
& \quad + 2C_1 \left\{ \sum_{i=k/2}^{k+1} \left( \sqrt{\frac{\log m^{(i)}}{m^{(i)}}} + \sqrt{\frac{\log m^{(i-1)}}{m^{(i-1)}}} \right) \right. \\
& \quad \left. + \sum_{i=1}^{k/2-1} (1 - \rho)^{k/2-i} \left( \sqrt{\frac{\log m^{(i)}}{m^{(i)}}} + \sqrt{\frac{\log m^{(i-1)}}{m^{(i-1)}}} \right) \right\} \\
& \leq (1 - \rho)^{\frac{k-1}{2}} (u_F - l_F) + 4C_1 \left\{ \sum_{i=k/2}^{k+1} \sqrt{\frac{\log m^{(i-1)}}{m^{(i-1)}}} \right. \\
& \quad \left. + \sum_{i=1}^{k/2-1} (1 - \rho)^{k/2-i} \sqrt{\frac{\log m^{(i-1)}}{m^{(i-1)}}} \right\} \\
& \quad \quad \quad (\frac{\log x}{x} \text{ decreases for } x > e) \\
& \leq (1 - \rho)^{\frac{k-1}{2}} (u_F - l_F) \\
& \quad + 4C_1 \sqrt{2 \log \frac{1}{1 - \rho}} \left\{ \sum_{i=k/2}^{k+1} (1 - \rho)^i \sqrt{i} \right. \\
& \quad \left. + \sum_{i=1}^{k/2-1} (1 - \rho)^{k/2-i} \sqrt{i} \right\} \\
& \leq C_2 (1 - \beta)^{\frac{k-1}{2}}
\end{aligned}$$

for some constant  $C_2$  and  $0 < \beta < \rho < 1$ .  $\square$

## 6 Proof of Corollary 3

*Proof.* Let  $k$  be the total number of iterations performed by Algorithm 2 so that an  $\epsilon$ -accurate solution is obtained for the first time. Theorem 1 implies  $C_2(1 - \beta)^{\frac{k-1}{2}} < \epsilon$  and hence  $k \geq 1 + 2 \log \epsilon / \log(1 - \beta)$ . In iteration  $i$  of Algorithm 2,  $m^{(i)} = 1/(1 - \rho)^{2i+2}$  of stochastic gradient evaluations are performed. Thus, the total number of stochastic gradient evaluations until iteration  $k$  is

$$\begin{aligned}
\sum_{i=1}^k m^{(i)} &= \sum_{i=1}^k \frac{1}{(1 - \rho)^{(2i+2)}} \\
&= \frac{1}{(1 - \rho)^2} \frac{1/(1 - \rho)^2 - 1/(1 - \rho)^{2k+2}}{1 - 1/(1 - \rho)^2} \\
&\leq \frac{2}{(1 - \rho)^{2k+4}} \leq \frac{2}{(1 - \rho)^4} \exp\{-2k \log(1 - \rho)\} \\
&\leq \frac{2}{(1 - \rho)^4} \exp\{-2 \log(1 - \rho) - 4 \frac{\log \epsilon \log(1 - \rho)}{\log(1 - \beta)}\} \\
&= O\left(\left(\frac{1}{\epsilon}\right)^{\frac{4 \log(1 - \rho)}{\log(1 - \beta)}}\right) \\
&= O\left(\left(\frac{1}{\epsilon}\right)^{4\eta}\right).
\end{aligned}$$

$\square$

## 7 Proof of Theorem 2

*Proof.* Since  $\mathbf{d}^{(k)} = \mathbf{p}^{(k)} - \mathbf{u}^{(k)}$ , similar to the proof of Theorem 1, we have

$$\begin{aligned}
\langle \mathbf{g}^{(k)}, \mathbf{d}^{(k)} \rangle^2 &\geq \frac{\Omega_{\mathcal{P}}^2 \sigma_F}{4N^2} \{F^{(k)}(\mathbf{x}^{(k)}) - F_*^{(k)}\} \\
\langle \mathbf{g}^{(k)}, \mathbf{d}^{(k)} \rangle &\leq \frac{1}{2} (F_*^{(k)} - F^{(k)}(\mathbf{x}^{(k)})).
\end{aligned}$$

The remaining proof for Theorem 1 could also apply here except that the case  $D^{(k)}$  can be either a ‘drop step’ or a so-called ‘swap step’. A swap step moves the weight of a active vertex to another active vertex. There are at most  $(1 - \frac{1}{3|V|+1})k$  drop steps and swap steps after  $k$  iteration. The same argument as in Theorem 1 implies

$$\mathbb{E}\{F(\mathbf{x}^{(k+1)}) - F^*\} \leq C_3(1 - \phi)^{k/(3|V|+1)}$$

for a deterministic constant  $C_3$  and  $0 < \phi < \kappa \leq 1/2$ .  $\square$

## 8 More Figures for Million Song Dataset Experiment

We tested the algorithms on the Million Song Dataset for different choices of  $\mu$  and  $\alpha$ . The performances of the algorithms follow the same pattern as we described in the paper.

# Supplementary Material: Linear Convergence of Stochastic Frank Wolfe Variants

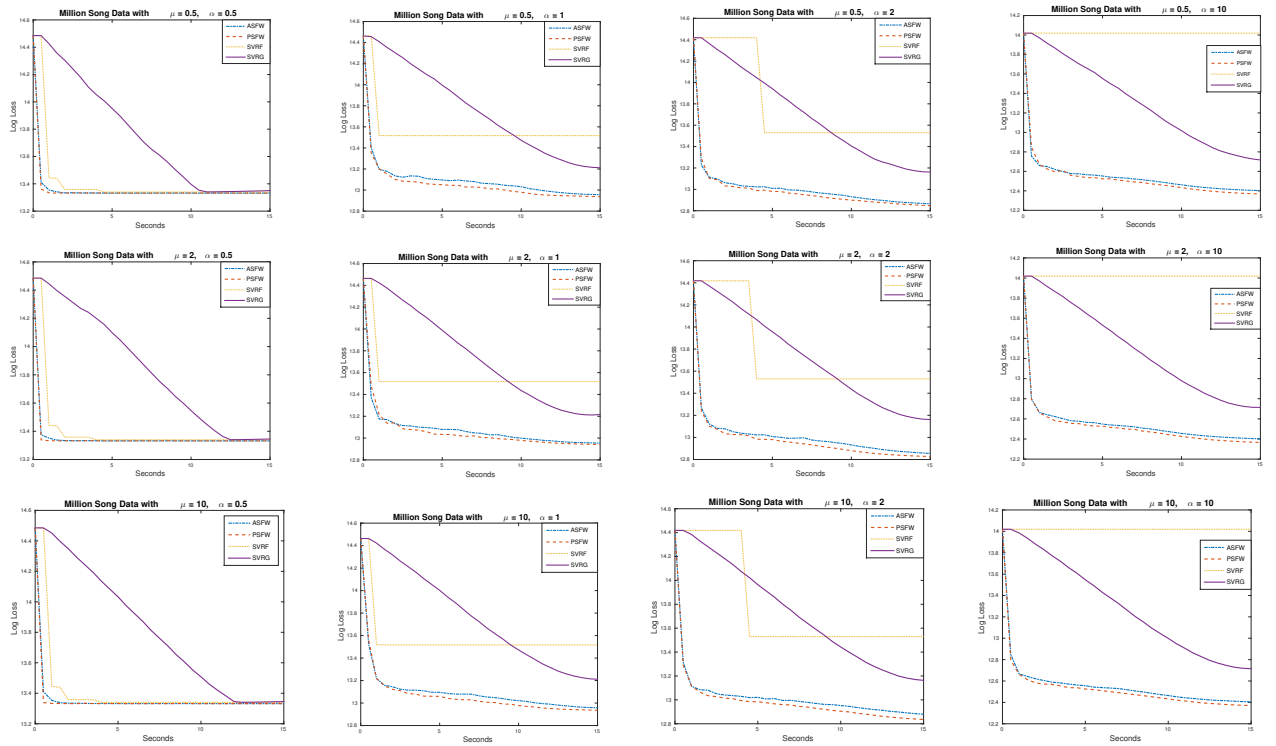

Supplement: Supplementary file 1 [file goldfarb17a-supp.pdf]
